# Supplementary material for: CNT addition to the LiBH4–MgH2composite: the effect of milling sequence on the hydrogen cycling properties
Source: Royal Society of Chemistry journal article supplement (doi:10.1039/c5ra19504g), 2015-01-01
Supplement: c5ra19504g1.pdf [file c5ra19504g1.pdf]

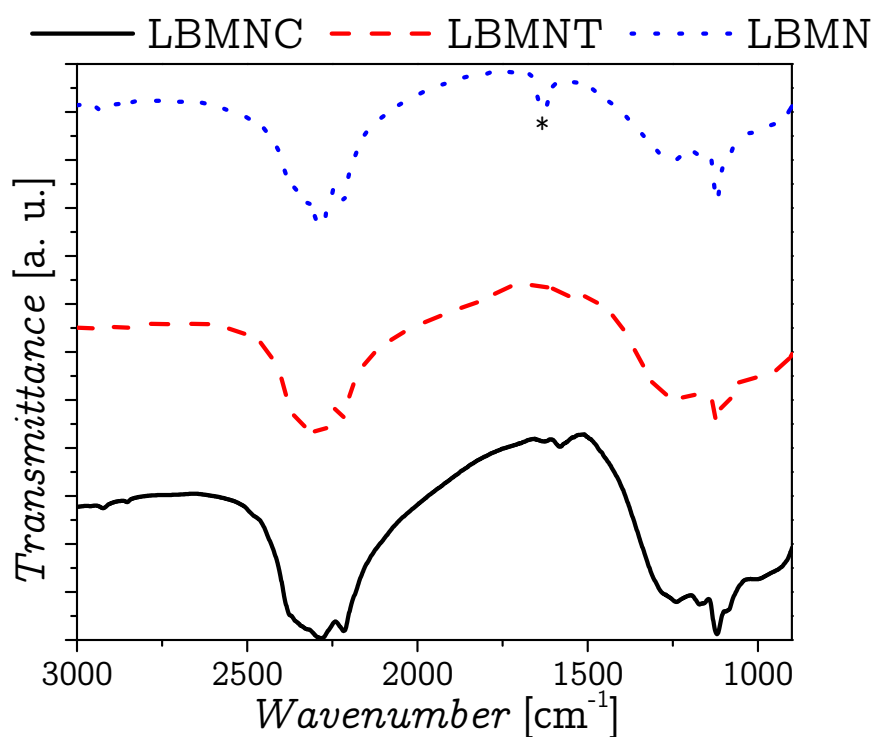

Figure A1: FTIR analyses of the LBMNC and LBMNT samples as milled showing no difference between them and the sample without CNT (LBMN). The peak marked with \* in the LBMN sample corresponds to water and may appear because of the presence of moisture in the sample.
